# Supplementary material for: Estimating the generation time for influenza transmission using household data in the United States
Source: PubMed Central journal article supplement (PMC11370535; doi:10.1101/2024.08.17.24312064), 2024-08-19
Supplement: NIHPP2024.08.17.24312064v1-supplement-1.pdf [file NIHPP2024.08.17.24312064v1-supplement-1.pdf]

## 554 **Supplementary material**

### 555 **The incubation period distribution**

556 The incubation period distribution was modeled using estimates for influenza A from a systematic  
557 review by Lessler et al. (Lessler, et al. 2009), with a mean of 1.55 days and a standard deviation (SD) of  
558 0.66 days. These estimates were fitted to a gamma distribution to characterize the distribution of the  
559 incubation period (Supplemental Figure S1).

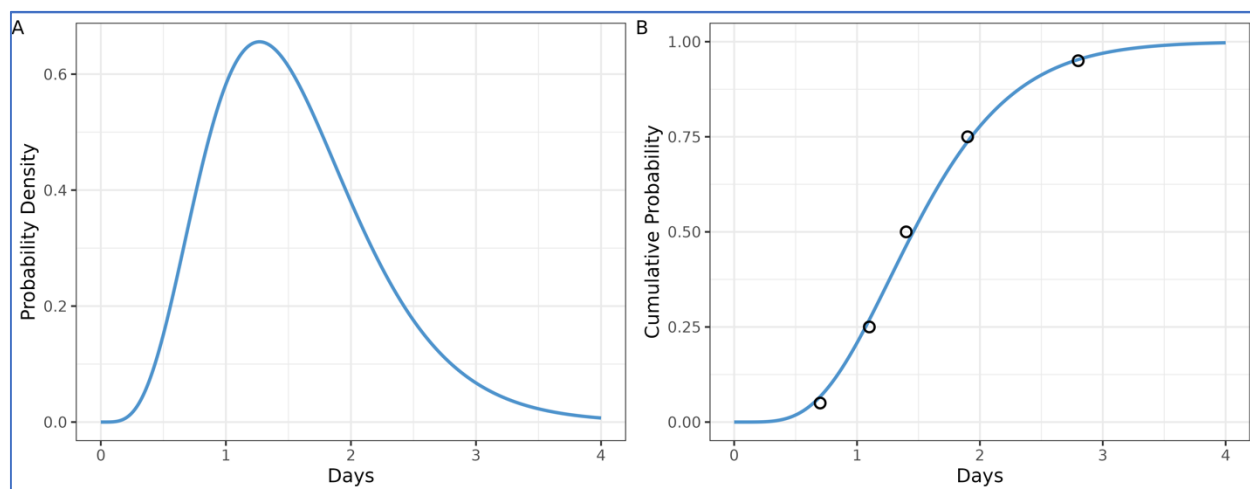

560

561 *Figure S1. Incubation period distribution. The black circles and blue lines represent the data (Lessler, et al. 2009), and the (A)*  
562 *cumulative distribution function and (B) probability density function of a gamma distribution fitted to the data.*

### 563 **The observed household serial interval of single infection pairs**

564 We found that the observed household serial interval, calculated without modeling, solely using data  
565 from households with single infection pairs (i.e., single primary case to single secondary case) and  
566 without potential transmission chains, had a mean of 3.7 days (and a SD of 2.3 days). This was longer  
567 than the mean intrinsic serial interval of 3.2 (95% CrI: 2.8-3.5) days when considering households of all  
568 sizes with all potential transmission chains (Table 2). This does not necessarily indicate that the intrinsic  
569 value was shorter than the realized household one. Rather, it is mainly due to the restriction of single  
570 infection pairs or mostly smaller household sizes of 2 members.

571 In the main text, we found slightly longer mean intrinsic and realized household generation times in  
572 smaller households compared to larger ones (Figure 1C and Supplemental Table S1). Larger households  
573 with more exposure and potential transmission chains could have a shorter interval, while smaller  
574 households could have a longer interval.

### 575 **Specification of parameters for the mechanistic model**

576 In the mechanistic model (Hart, Abbott, et al. 2022), two parameters, namely the ratio of the mean  
577 latent and incubation period and the mean symptomatic infectious period, were estimated directly  
578 (Supplemental Figure S2), while the proportion of transmission before symptomatic onset was  
579 calculated by weighting the pre-symptomatic period by the ratio of pre-symptomatic and symptomatic  
580 transmission rates and dividing it by the sum of the (pre-symptomatic and symptomatic) infectious  
581 periods. The mean latent and mean pre-symptomatic periods were calculated by dividing the incubation  
582 period by the ratio of mean latent and incubation period.

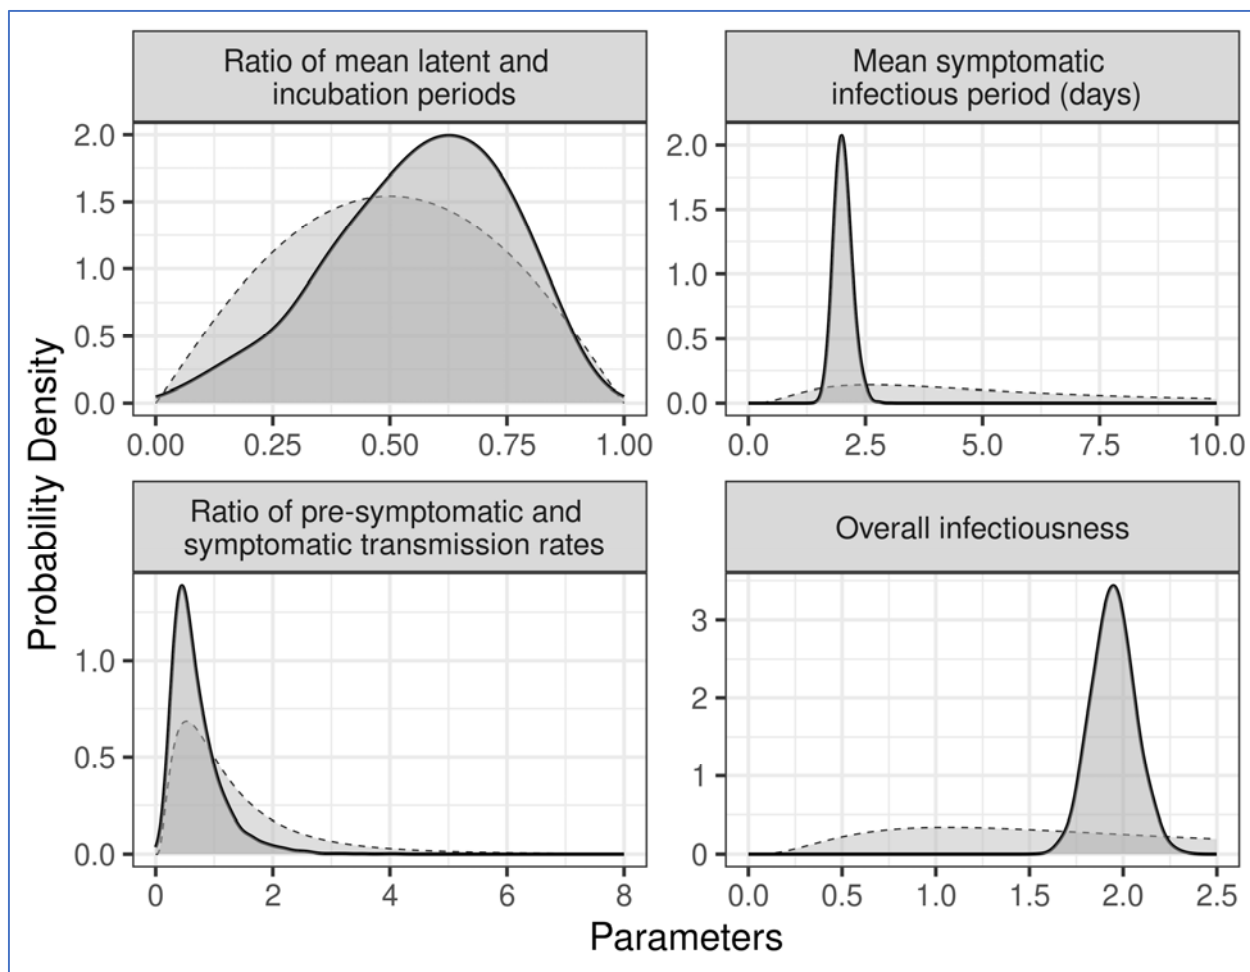

583

584 *Figure S2. Posterior and prior distributions of estimated parameters. Solid and dashed lines represent posterior and prior*  
 585 *distributions, respectively.*

586 **Variability in estimates across data stratifications**

587 Although the generation time or serial interval of influenza B may be longer than that of influenza A  
 588 (Levy, et al. 2013), this was not the case in our findings from the two seasons (Supplemental Table S1,  
 589 Figure S3 and S4). However, we note that the mean intrinsic generation time exhibited a wider credible  
 590 interval when using data exclusively from influenza B compared to influenza A, which likely reflects the  
 591 dominance of influenza A during the study timeframe and the smaller sample size of influenza B.

| Data stratifications                                                                       | Mean intrinsic generation time (95% CrIs) | Overlapping index (% compared to the primary analysis) |
|--------------------------------------------------------------------------------------------|-------------------------------------------|--------------------------------------------------------|
| All data excluding households with multiple co-primary cases (primary analysis in Table 1) | 3.2 (2.9-3.6)                             | 100                                                    |
| Season 2021/2022                                                                           | 3.3 (2.8-4.0)                             | 71                                                     |
| Season 2022/2023                                                                           | 3.2 (2.8-3.6)                             | 87                                                     |
| Influenza A                                                                                | 3.2 (2.9-3.6)                             | 94                                                     |
| Influenza B                                                                                | 3.2 (2.3-4.5)                             | 47                                                     |

|                                                              |               |    |
|--------------------------------------------------------------|---------------|----|
| Household size of 2 or 3                                     | 3.4 (2.9-4.0) | 61 |
| Household size of 4 or greater                               | 3.1 (2.7-3.6) | 74 |
| All data including households with multiple co-primary cases | 3.1 (2.7-3.4) | 64 |

592 *Table S1. The posterior mean (95% CrIs) of mean intrinsic generation time across seasons, virus types, household sizes, and with*  
593 *multiple co-primary cases. The incubation period, derived from influenza A, had a mean of 1.55 days and a standard deviation*  
594 *(SD) of 0.66 days (Lessler, et al. 2009). Only for influenza B, we assumed the shorter incubation period to yield a mean of 0.61*  
595 *days and a standard deviation (SD) of 0.25 days.*

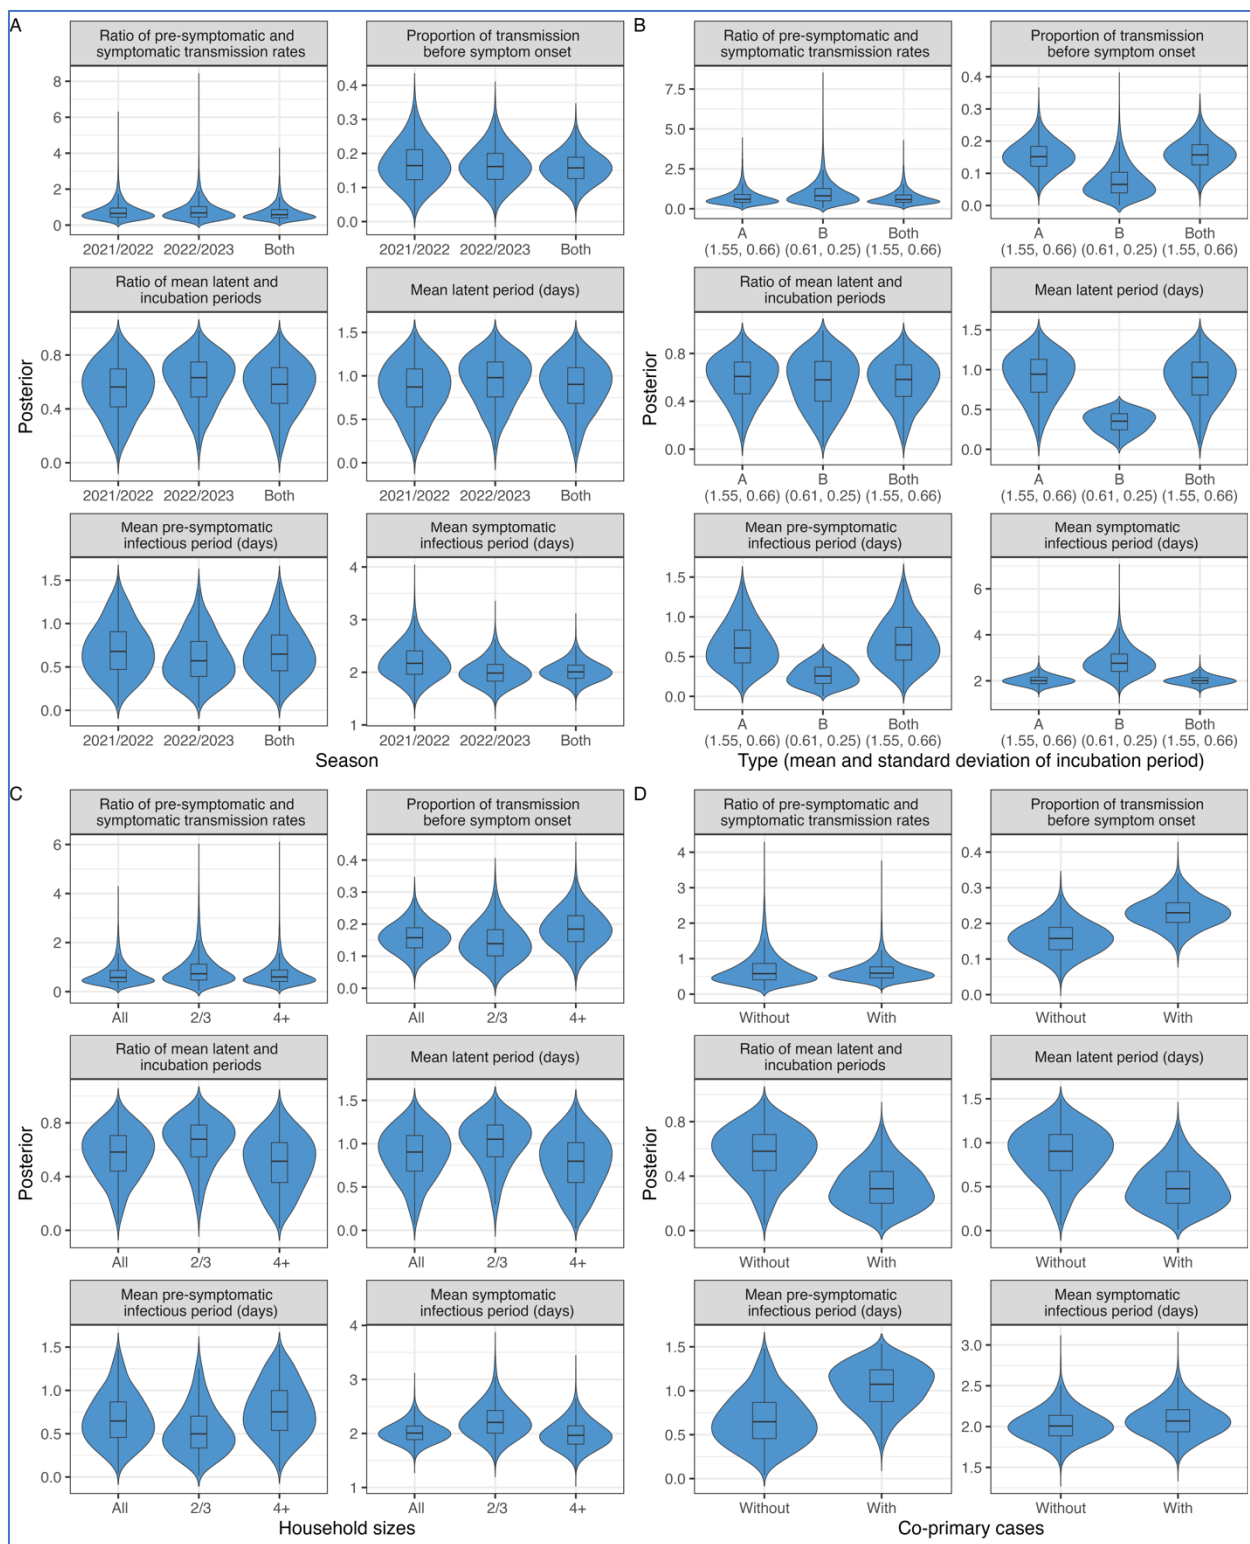

596

597

598

Figure S3. Posterior distributions of parameters across data stratifications: (A) seasons, (B) virus types, (C) household sizes, and (D) with multiple co-primary cases.

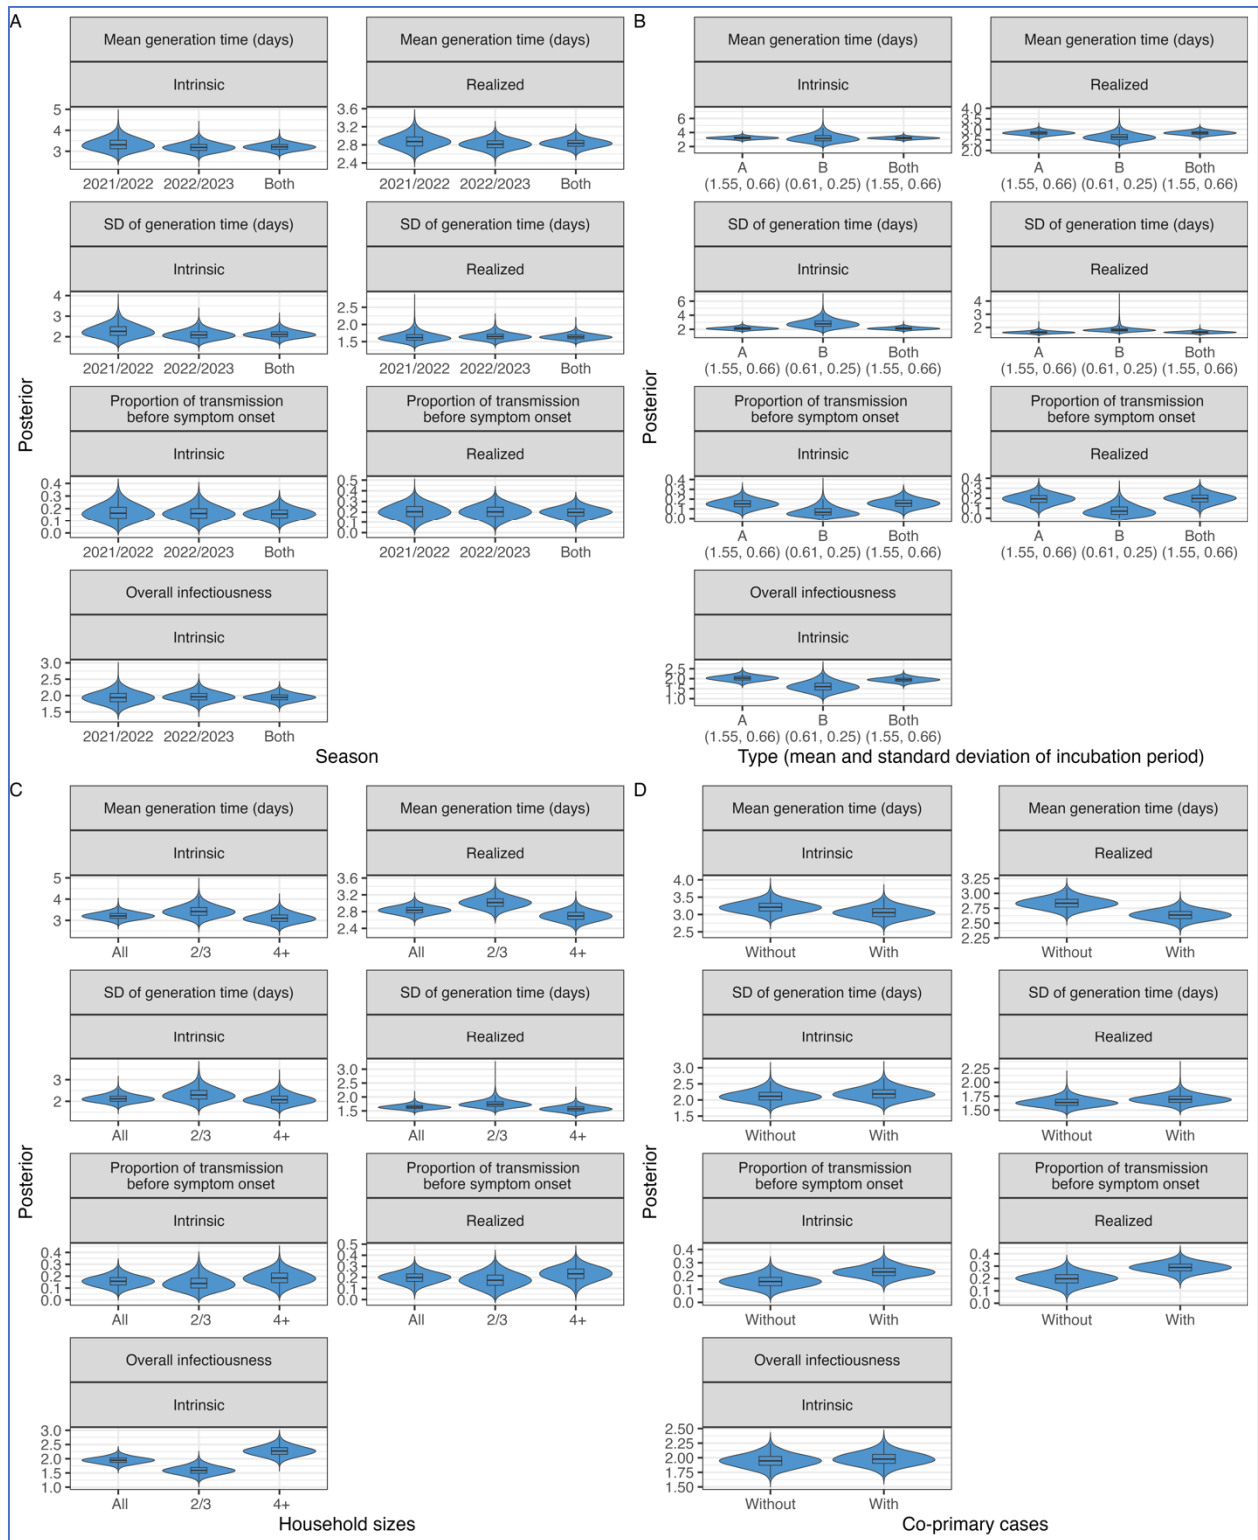

599

600  
601

Figure S4. Posterior distributions of parameters across data stratifications: (A) seasons, (B) virus types, (C) household sizes, and (D) with multiple co-primary cases.

## 602 Sensitivity analyses

603 Similar to the sensitivity analyses using the full dataset, we found that the incubation period had a  
604 limited effect on the intrinsic generation time when exclusively using data from households circulating  
605 influenza A (Supplemental Figure S6, Panel B) or households circulating influenza B (Supplemental Figure  
606 S6, Panel C).

607 Consistent with the previous study (Hart, Abbott, et al. 2022), assuming a higher relative infectiousness  
608 of asymptomatic infected individuals resulted in slightly lower estimates of the overall infectiousness of  
609 infectors (Supplemental Figure S6, Panel D).

| <b>Sensitivity analyses</b>    | <b>Mean intrinsic generation time (95% CrIs)</b> | <b>Overlapping index (% compared to the primary analysis)</b> |
|--------------------------------|--------------------------------------------------|---------------------------------------------------------------|
| Primary analysis (in Table 1)  | 3.2 (2.9-3.6)                                    | 100                                                           |
| Longer incubation period       | 3.2 (2.8-3.6)                                    | 86                                                            |
| Shorter incubation period      | 3.4 (3.1-3.7)                                    | 56                                                            |
| Lower relative infectiousness  | 3.2 (2.9-3.6)                                    | 94                                                            |
| Higher relative infectiousness | 3.2 (2.9-3.6)                                    | 97                                                            |

610 *Table S2. The posterior mean (95% CrIs) of mean intrinsic generation time given different incubation periods or relative*  
611 *infectiousness of asymptomatic infected individuals. The primary incubation period, derived from influenza A, had a mean of*  
612 *1.55 days and a standard deviation (SD) of 0.66 days (Lessler, et al. 2009). For the shorter incubation period derived from*  
613 *influenza B, we assumed a mean of 0.61 days and a SD of 0.25 days (Lessler, et al. 2009). For the longer incubation period*  
614 *derived from influenza A(H1N1)pdm09, we assumed a mean of 0.61 days and a SD of 0.25 days (Tuite, et al. 2010).*

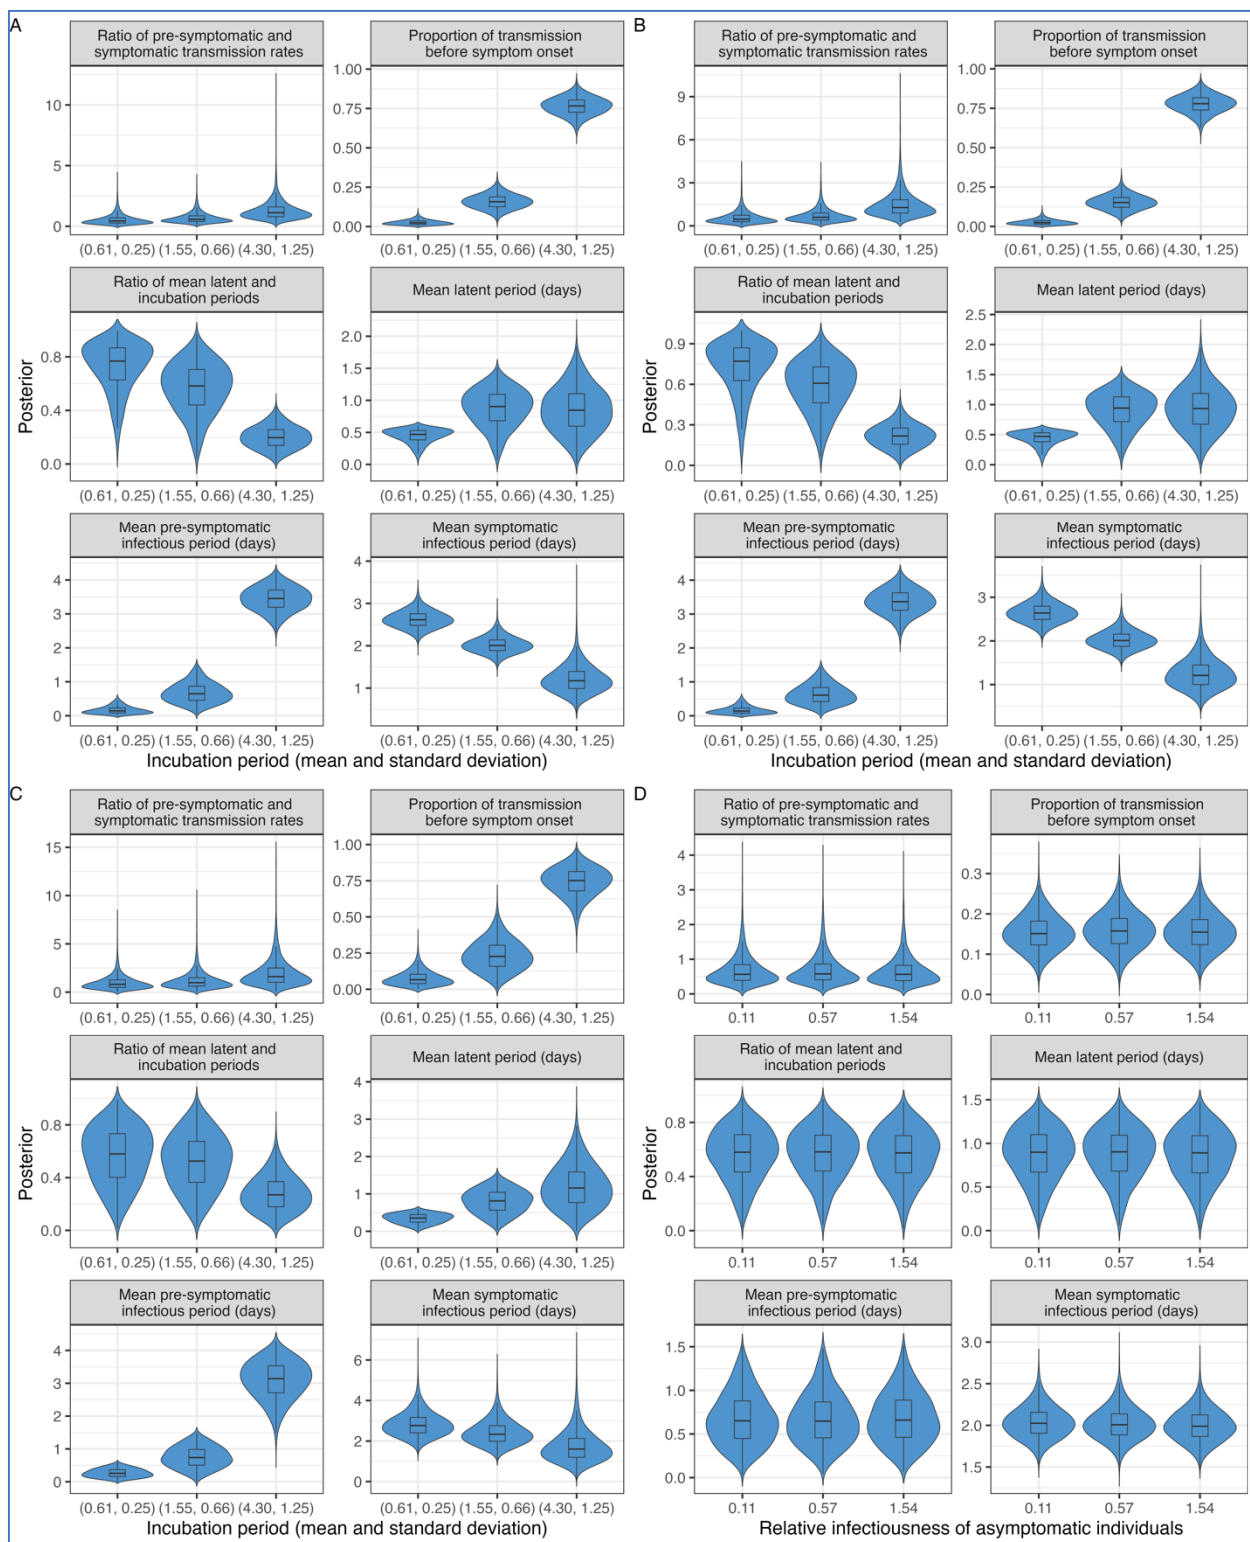

615

616 *Figure S5. Posterior distributions of parameters given different assumptions: (A-C) incubation periods, and (D) relative*  
 617 *infectiousness of asymptomatic infected individuals. Panel (A) presents results obtained using data from households with both*  
 618 *influenza A and B, whereas Panels (B) and (C) present results obtained using data solely from households with influenza A and B,*  
 619 *respectively.*

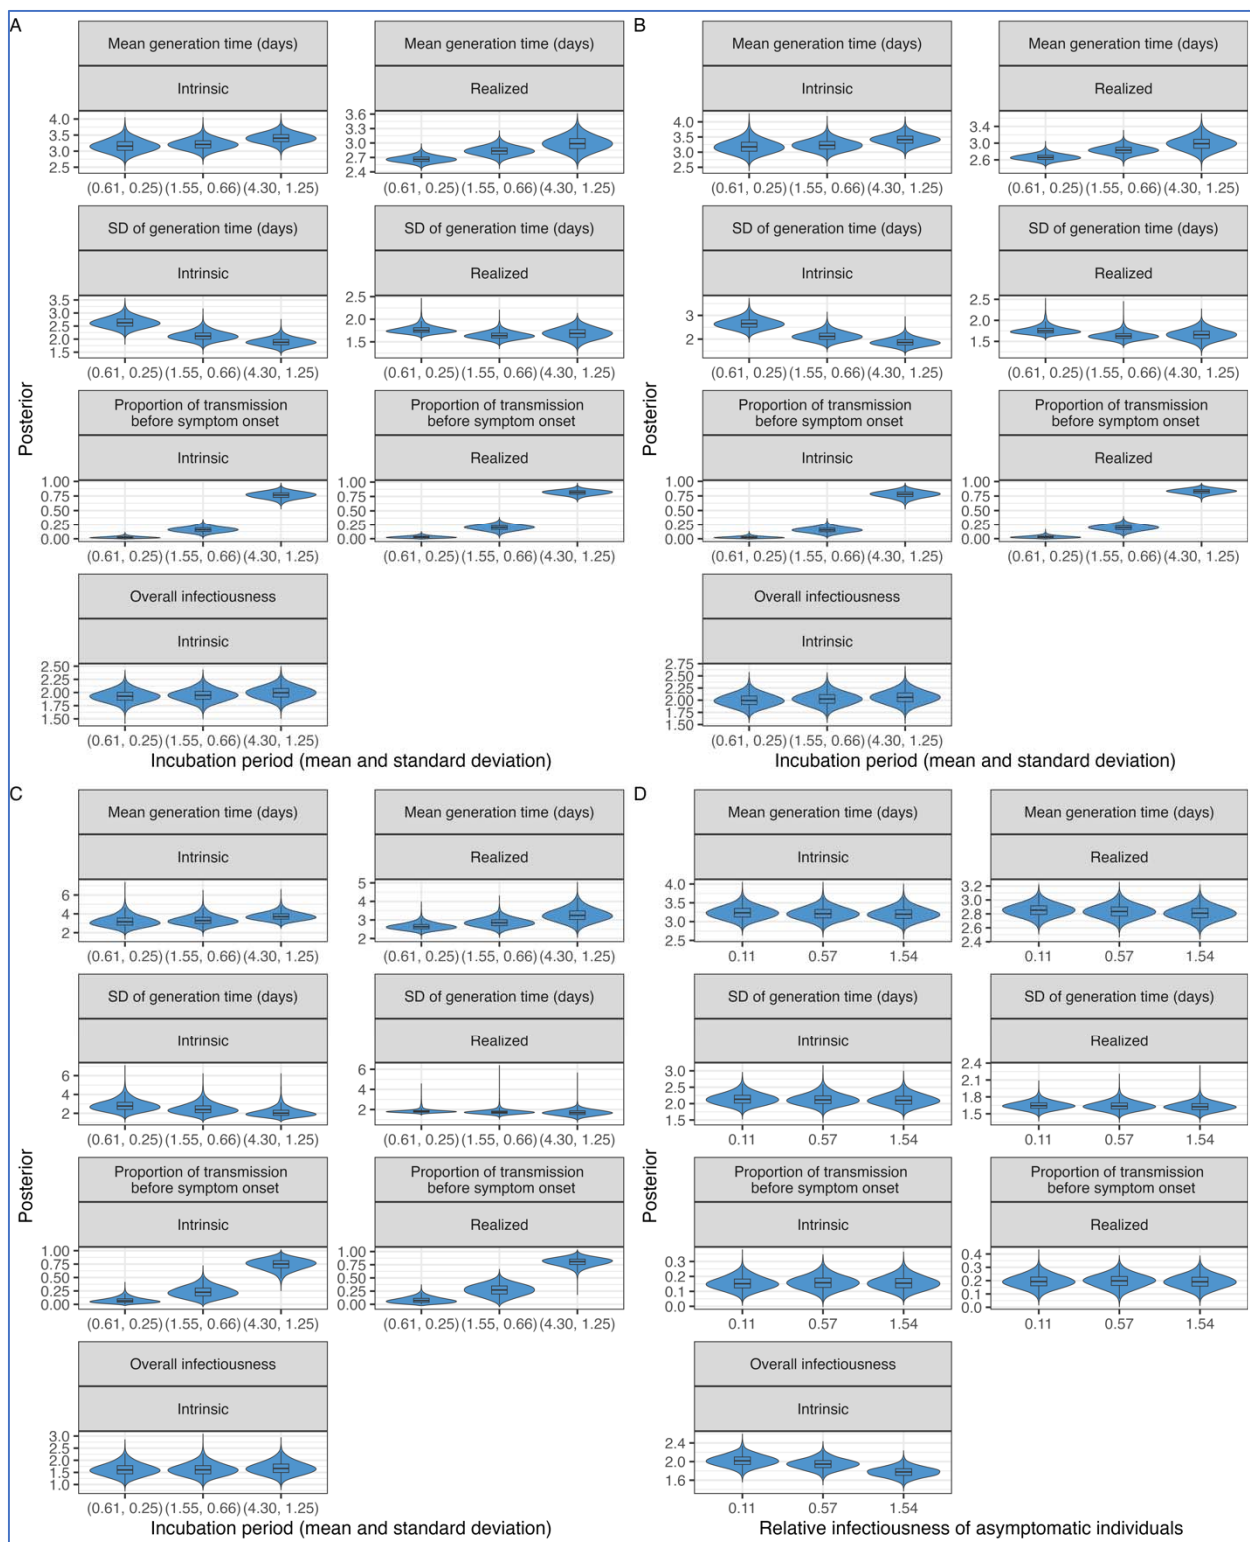

620

621 *Figure S6. Posterior distributions of parameters given different assumptions: (A-C) incubation periods, and (D) relative*  
 622 *infectiousness of asymptomatic infected individuals. Panel (A) presents results obtained using data from households with both*  
 623 *influenza A and B, whereas Panels (B) and (C) present results obtained using data solely from households with influenza A and B,*  
 624 *respectively.*
